# Supplementary material for: Fish—To Eat or Not to Eat? A Mixed-Methods Investigation of the Conundrum of Fish Consumption in the Context of Marine Pollution in Indonesia
Source: MDPI journal article supplement (doi:10.3390/ijerph20085582), 2023-04-19
Supplement: s1 [file s1]

**Supplemental Table S1:** Multinomial regression analyses of the association between quintiles<sup>1</sup> of fish consumption and sociodemographic factors

|                                                   | Quintile 2 <sup>1</sup><br>(n = 4,948) |       |              |              | Quintile 3 <sup>1</sup><br>(n = 7,449) |       |              |              | Quintile 4 <sup>1</sup><br>(n = 4,909) |       |              |              | Quintile 5 <sup>1</sup><br>(n = 7,622) |       |              |              |
|---------------------------------------------------|----------------------------------------|-------|--------------|--------------|----------------------------------------|-------|--------------|--------------|----------------------------------------|-------|--------------|--------------|----------------------------------------|-------|--------------|--------------|
| Characteristics                                   | Adj.<br>RRR <sup>3</sup>               | P-val | 95%<br>CI LL | 95%<br>CI UL | Adj.<br>RRR <sup>3</sup>               | P-val | 95%<br>CI LL | 95%<br>CI UL | Adj.<br>RRR <sup>3</sup>               | P-val | 95%<br>CI LL | 95%<br>CI UL | Adj.<br>RRR <sup>3</sup>               | P-val | 95%<br>CI LL | 95%<br>CI UL |
| <b>Education Level, n (%)<sup>2</sup></b>         |                                        |       |              |              |                                        |       |              |              |                                        |       |              |              |                                        |       |              |              |
| Primary or less 10,374 (44.6)                     | 1.00                                   | -     | -            |              | 1.00                                   | -     | -            |              | 1.00                                   | -     |              | -            | 1.00                                   | -     | -            | -            |
| Secondary 16,382 (44.4)                           | 1.14                                   | 0.020 | 1.02         | 1.27         | 1.17                                   | 0.002 | 1.06         | 1.29         | 1.21                                   | 0.002 | 1.07         | 1.36         | 0.97                                   | 0.528 | 0.87         | 1.07         |
| Some college 1,122 (2.9)                          | 1.21                                   | 0.162 | 0.93         | 1.58         | 1.51                                   | 0.001 | 1.19         | 1.91         | 1.58                                   | 0.000 | 1.23         | 2.02         | 1.00                                   | 0.984 | 0.76         | 1.30         |
| ≥ Bachelors 3,154 (8.1)                           | 1.30                                   | 0.007 | 1.07         | 1.57         | 1.84                                   | 0.000 | 1.56         | 2.18         | 1.90                                   | 0.000 | 1.58         | 2.29         | 1.49                                   | 0.000 | 1.25         | 1.78         |
| <b>Agricultural Occupation, n (%)<sup>2</sup></b> |                                        |       |              |              |                                        |       |              |              |                                        |       |              |              |                                        |       |              |              |
| Non-farmer 19,835 (59.8)                          | 1.00                                   | -     | -            | -            | 1.00                                   | -     | -            | -            | 1.00                                   | -     | -            | -            | 1.00                                   | -     | -            | -            |
| Non-fish farmer 10,305 (38.1)                     | 0.96                                   | 0.477 | 0.86         | 1.07         | 1.07                                   | 0.176 | 0.97         | 1.19         | 1.06                                   | 0.360 | 0.94         | 1.18         | 1.19                                   | 0.002 | 1.07         | 1.32         |
| Fishery occupation 892 (2.1)                      | 1.02                                   | 0.941 | 0.66         | 1.57         | 1.47                                   | 0.038 | 1.02         | 2.12         | 2.70                                   | 0.000 | 1.87         | 3.89         | 5.65                                   | 0.000 | 4.10         | 7.79         |
| <b>Age Group, n (%)<sup>2</sup></b>               |                                        |       |              |              |                                        |       |              |              |                                        |       |              |              |                                        |       |              |              |
| 15 - 19 Y 3,550 (7.6)                             | 0.89                                   | 0.190 | 0.75         | 1.06         | 0.66                                   | 0.000 | 0.56         | 0.78         | 1.24                                   | 0.016 | 1.04         | 1.48         | 1.01                                   | 0.927 | 0.84         | 1.21         |
| 20 - 49 Y 20,876 (57.1)                           | 1.00                                   | -     | -            | -            | 1.00                                   | -     | -            | -            | 1.00                                   | -     | -            | -            | 1.00                                   | -     | -            | -            |
| ≥ 50 Y 6,606 (35.3)                               | 0.88                                   | 0.039 | 0.78         | 0.99         | 0.93                                   | 0.181 | 0.83         | 1.04         | 0.80                                   | 0.001 | 0.70         | 0.92         | 1.18                                   | 0.004 | 1.05         | 1.33         |
| <b>Gender, n (%)<sup>2</sup></b>                  |                                        |       |              |              |                                        |       |              |              |                                        |       |              |              |                                        |       |              |              |
| Male 14,494 (46.3)                                | 1.00                                   | -     | -            | -            | 1.00                                   | -     | -            | -            | 1.00                                   | -     | -            | -            | 1.00                                   | -     | -            | -            |
| Female 16,538 (53.7)                              | 0.96                                   | 0.429 | 0.88         | 1.06         | 0.56                                   | 0.000 | 0.51         | 0.61         | 2.03                                   | 0.000 | 1.83         | 2.24         | 0.91                                   | 0.050 | 0.83         | 1.00         |
| <b>Place of Residence, n (%)<sup>2</sup></b>      |                                        |       |              |              |                                        |       |              |              |                                        |       |              |              |                                        |       |              |              |
| Rural 16,538 (53.7)                               | 1.00                                   | -     | -            | -            | 1.00                                   | -     | -            | -            | 1.00                                   | -     | -            | -            | 1.00                                   | -     | -            | -            |
| Urban 18,279 (49.7)                               | 1.22                                   | 0.000 | 1.10         | 1.36         | 1.09                                   | 0.081 | 0.99         | 1.20         | 0.98                                   | 0.676 | 0.88         | 1.09         | 0.85                                   | 0.002 | 0.76         | 0.94         |
| <b>Region, n (%)<sup>2</sup></b>                  |                                        |       |              |              |                                        |       |              |              |                                        |       |              |              |                                        |       |              |              |
| Java 16,865 (72.8)                                | 1.00                                   | -     | -            | -            | 1.00                                   | -     | -            | -            | 1.00                                   | -     | -            | -            | 1.00                                   | -     | -            | -            |
| Kalimantan 1,563 (3.2)                            | 1.41                                   | 0.028 | 1.04         | 1.91         | 2.52                                   | 0.000 | 1.96         | 3.25         | 4.80                                   | 0.000 | 3.73         | 6.19         | 11.16                                  | 0.000 | 8.85         | 14.06        |
| N. Tengarra 3,902 (4.8)                           | 1.54                                   | 0.000 | 1.33         | 1.79         | 1.64                                   | 0.000 | 1.43         | 1.88         | 2.09                                   | 0.000 | 1.79         | 2.43         | 4.96                                   | 0.000 | 4.35         | 5.66         |
| Sulawesi 1,541 (3.1)                              | 1.36                                   | 0.150 | 0.90         | 2.05         | 2.51                                   | 0.000 | 1.78         | 3.55         | 5.03                                   | 0.000 | 3.60         | 7.01         | 40.37                                  | 0.000 | 30.11        | 54.12        |
| Sumatra 7,161 (16.1)                              | 1.81                                   | 0.000 | 1.61         | 2.04         | 2.16                                   | 0.000 | 1.95         | 2.41         | 2.90                                   | 0.000 | 2.59         | 3.26         | 3.55                                   | 0.000 | 3.18         | 3.97         |
| <b>Marital Status, n (%)<sup>2</sup></b>          |                                        |       |              |              |                                        |       |              |              |                                        |       |              |              |                                        |       |              |              |
| Divorced 790 (2.9)                                | 1.16                                   | 0.359 | 0.85         | 1.59         | 1.41                                   | 0.019 | 1.06         | 1.89         | 1.25                                   | 0.189 | 0.90         | 1.74         | 2.00                                   | 0.000 | 1.46         | 2.74         |

|                                        |      |       |      |      |      |       |      |      |      |       |      |      |      |       |      |      |
|----------------------------------------|------|-------|------|------|------|-------|------|------|------|-------|------|------|------|-------|------|------|
| Married 22,523 (74.0)                  | 1.37 | 0.000 | 1.17 | 1.59 | 1.40 | 0.000 | 1.22 | 1.60 | 1.31 | 0.001 | 1.12 | 1.53 | 1.95 | 0.000 | 1.67 | 2.29 |
| Single 6,135 (15.0)                    | 1.00 | -     | -    | -    | 1.00 | -     | -    | -    | 1.00 | -     | -    | -    | 1.00 | -     | -    | -    |
| Widowed 1,584 (8.1)                    | 1.09 | 0.498 | 0.85 | 1.40 | 1.05 | 0.665 | 0.83 | 1.33 | 1.06 | 0.665 | 0.81 | 1.38 | 1.28 | 0.056 | 0.99 | 1.64 |
| <b>Other Animal Source Foods</b>       |      |       |      |      |      |       |      |      |      |       |      |      |      |       |      |      |
| Meat (beef, chicken, pork)             | 1.02 | 0.097 | 1.00 | 1.06 | 1.06 | 0.000 | 1.03 | 1.09 | 1.14 | 0.000 | 1.11 | 1.17 | 1.08 | 0.000 | 1.05 | 1.11 |
| Eggs                                   | 0.97 | 0.024 | 0.95 | 1.00 | 1.07 | 0.000 | 1.05 | 1.09 | 1.09 | 0.000 | 1.07 | 1.12 | 1.10 | 0.000 | 1.07 | 1.13 |
| Dairy                                  | 1.00 | 0.998 | 0.98 | 1.02 | 1.03 | 0.002 | 1.01 | 1.05 | 1.05 | 0.000 | 1.03 | 1.07 | 1.06 | 0.000 | 1.04 | 1.08 |
| <b>Weight Status n (%)<sup>4</sup></b> |      |       |      |      |      |       |      |      |      |       |      |      |      |       |      |      |
| Normal Weight 12,606 (39.6)            | 1.00 | -     | -    | -    | 1.00 | -     | -    | -    | 1.00 | -     | -    | -    | 1.00 | -     | -    | -    |
| Obese 5,177 (17.4)                     | 1.26 | 0.001 | 1.10 | 1.44 | 1.11 | 0.094 | 0.98 | 1.26 | 1.16 | 0.035 | 1.01 | 1.34 | 1.27 | 0.001 | 1.11 | 1.44 |
| Overweight 9,422 (30.9)                | 1.08 | 0.173 | 0.97 | 1.21 | 1.12 | 0.027 | 1.01 | 1.24 | 1.17 | 0.009 | 1.04 | 1.31 | 1.13 | 0.023 | 1.02 | 1.27 |
| Underweight 3,827 (12.1)               | 0.96 | 0.556 | 0.83 | 1.11 | 0.97 | 0.694 | 0.85 | 1.11 | 1.00 | 0.976 | 0.85 | 1.16 | 0.93 | 0.366 | 0.80 | 1.09 |
| Constant                               | 0.47 | 0.000 | 0.38 | 0.57 | 0.62 | 0.000 | 0.51 | 0.74 | 0.14 | 0.000 | 0.11 | 0.17 | 0.21 | 0.000 | 0.17 | 0.26 |

1. Base outcome = Quintile 1.
2. N is weighted to account for sampling design and attrition factor.
3. Adjusted RRR= Relative Risk Ratio; sociodemographic variables: education level, age, gender, place of residence, region, marital status, agricultural occupation simultaneously included in the model; additionally adjusted for weight status, other ASFs: meat, eggs, dairy
4. Weight status derived from BMI categories based on Asian population cut-offs.
